# Supplementary material for: Benzophenone Derivatives from an Algal-Endophytic Isolate of Penicillium chrysogenum and Their Cytotoxicity
Source: PubMed Central journal article supplement (PMC6321059; doi:10.3390/molecules23123378), 2018-12-19
Supplement: molecules-23-03378-s001.pdf [file molecules-23-03378-s001.pdf]

## Table of Contents

**Scheme S1.** Proposed biosynthetic pathways to compounds **1–2**

**Figure S1.** HRESIMS spectrum of compound **1**

**Figure S2.**  $^1\text{H}$  NMR (500 MHz,  $\text{DMSO-}d_6$ ) spectrum of compound **1**

**Figure S3.**  $^{13}\text{C}$  NMR (125 MHz,  $\text{DMSO-}d_6$ ) spectrum of compound **1**

**Figure S4.** COSY spectrum of compound **1**

**Figure S5.** HSQC spectrum of compound **1**

**Figure S6.** HMBC spectrum of compound **1**

**Figure S7.** NOESY spectrum of compound **1**

**Figure S8.** HRESIMS spectrum of compound **2**

**Figure S9.**  $^1\text{H}$  NMR (500 MHz,  $\text{DMSO-}d_6$ ) spectrum of compound **2**

**Figure S10.**  $^{13}\text{C}$  NMR (125 MHz,  $\text{DMSO-}d_6$ ) and DEPT spectra of compound **2**

**Figure S11.** COSY spectrum of compound **2**

**Figure S12.** HSQC spectrum of compound **2**

**Figure S13.** HMBC spectrum of compound **2**

**Figure S14.** NOESY spectrum of compound **2**

**Figure S15.** Structure and population of the low-energy B3LYP/6-31G(d) conformers ( $>2\%$ ) of (20S,25S)-**1**.

**Figure S16.** Structure and population of the low-energy B3LYP/6-31G(d) conformers ( $>2\%$ ) of (20S,25S)-**2**.

**Table S1.** Cartesian coordinates of the low-energy conformers ( $\geq 2\%$ ) of **1**

**Table S2.** Cartesian coordinates of the low-energy conformers ( $\geq 2\%$ ) of **2**

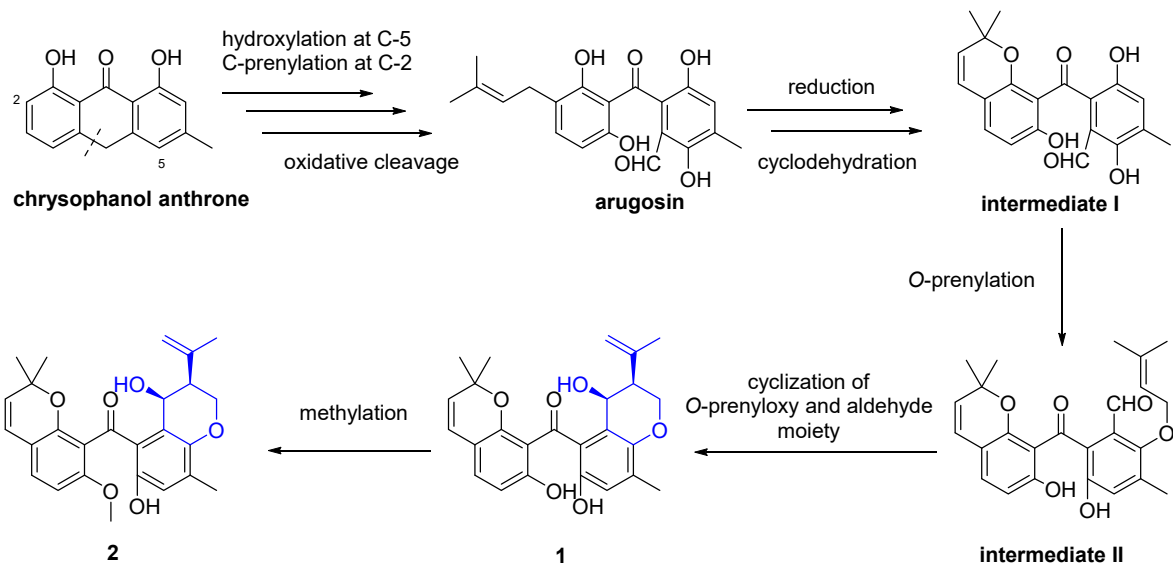

**Scheme S1** Proposed biosynthetic pathways to compounds **1-2**.

20181008-ZX-5\_180930140951 #6 RT: 0.06 AV: 1 NL: 3.98E6  
T: FTMS - c ESI Full ms [200.00-2000.00]

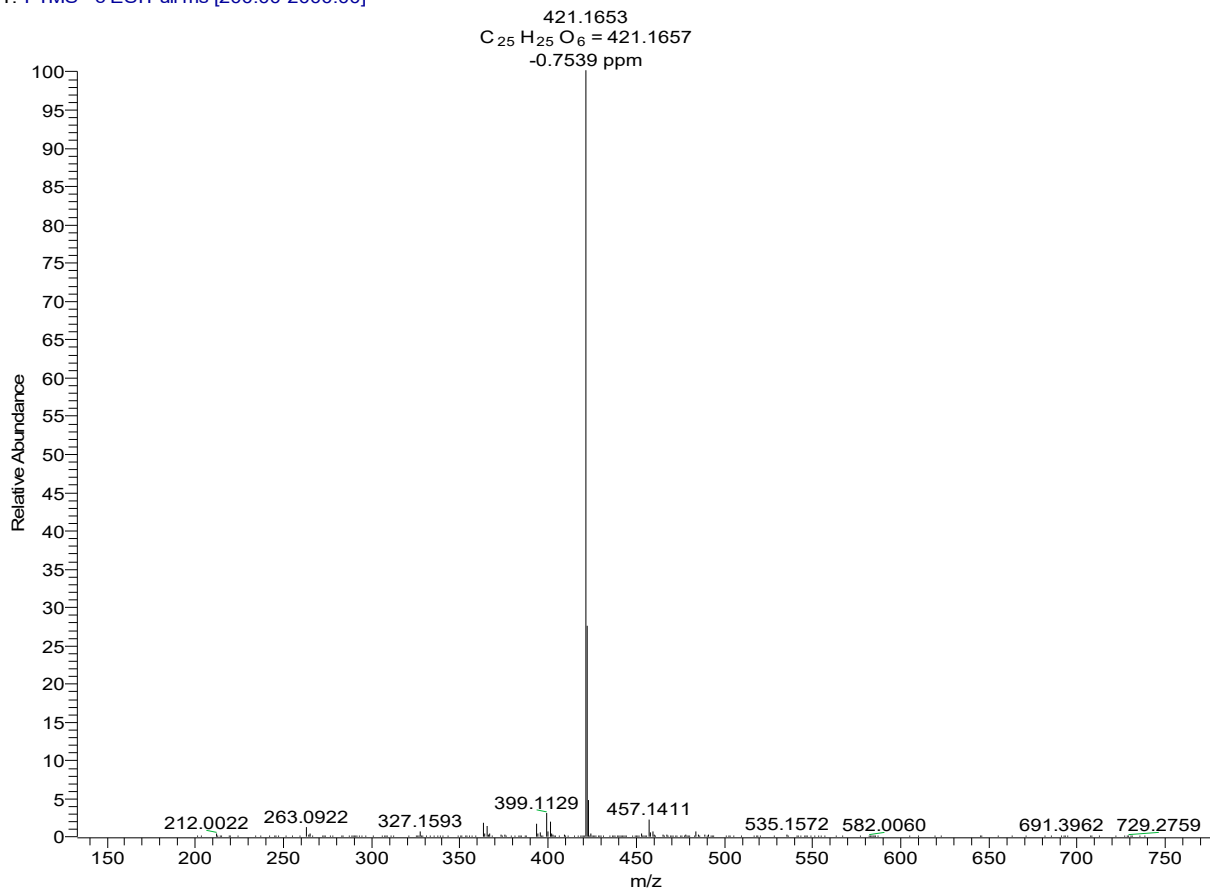

**Figure S1.** HRESIMS spectrum of compound **1**.

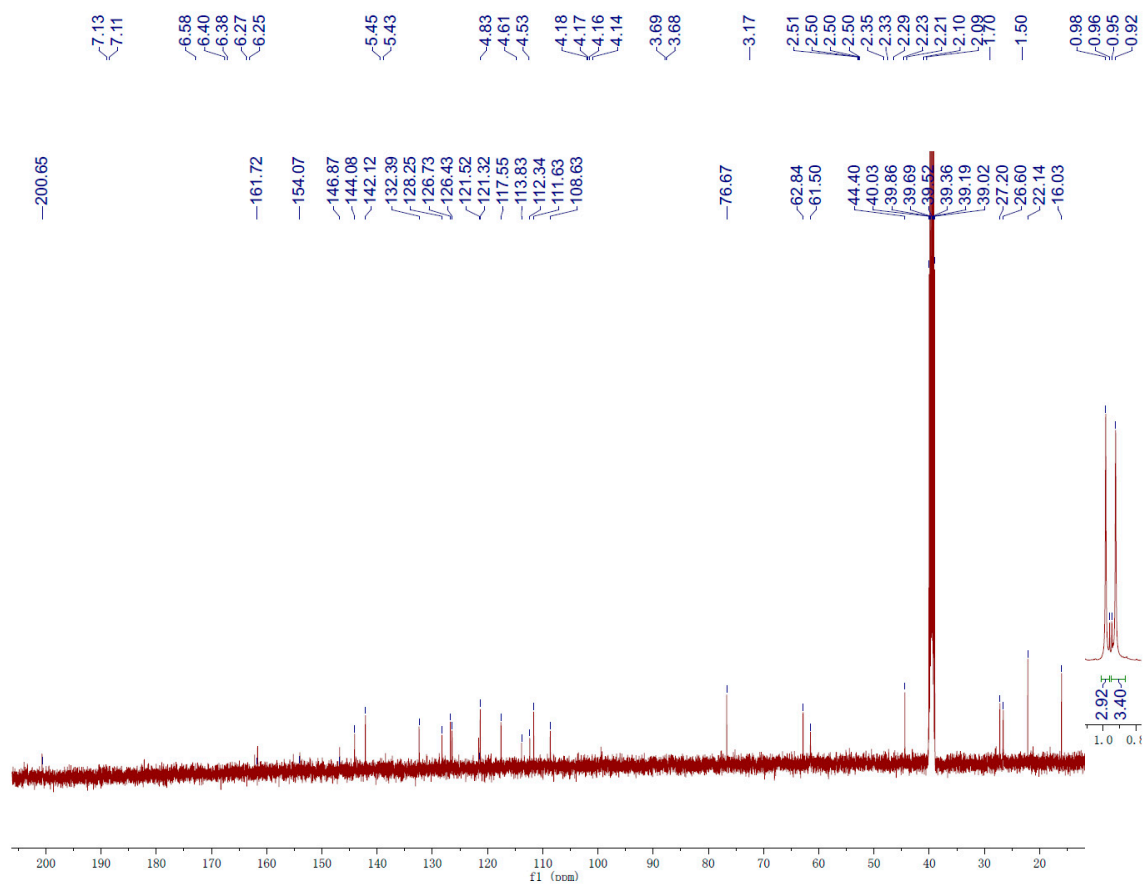

Figure S3.  $^{13}\text{C}$  NMR (125 MHz,  $\text{DMSO-}d_6$ ) spectrum of compound **1**.

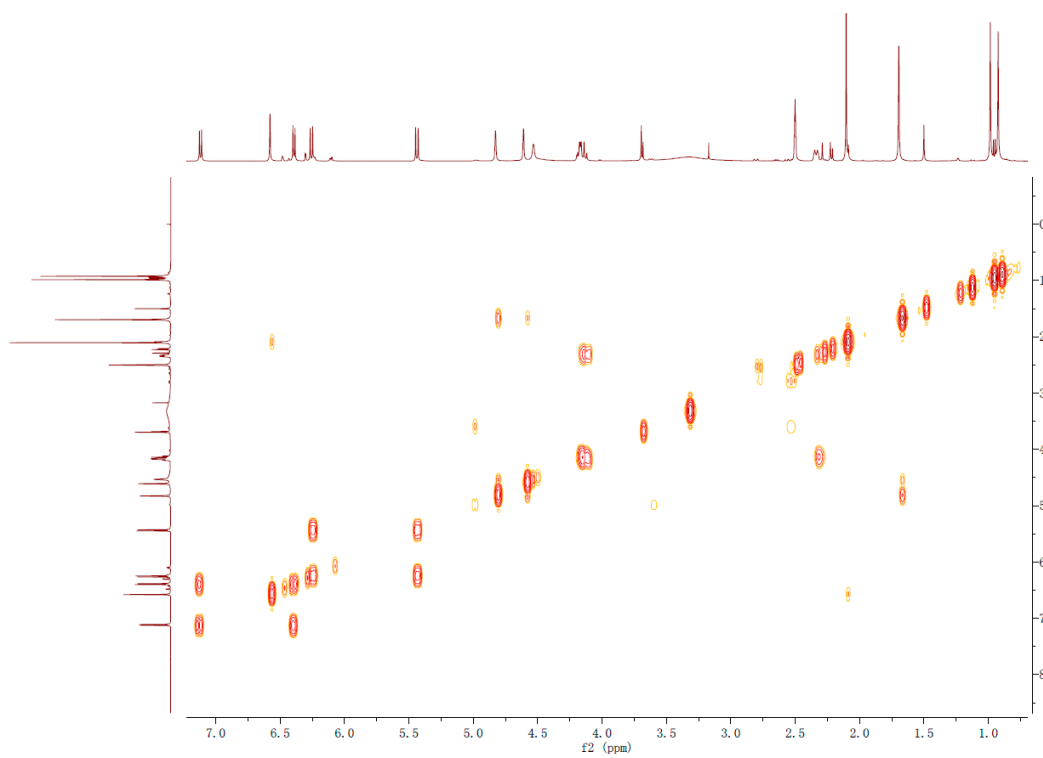

Figure S4. COSY spectrum of compound **1**.

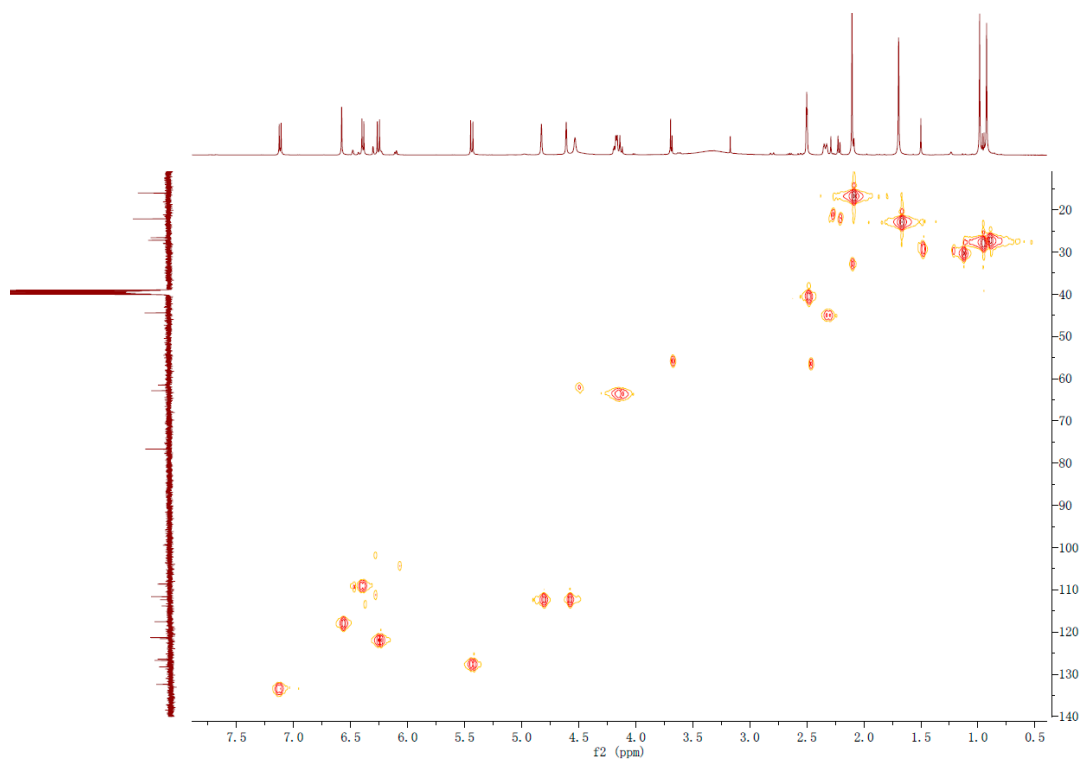

Figure S5. HSQC spectrum of compound **1**.

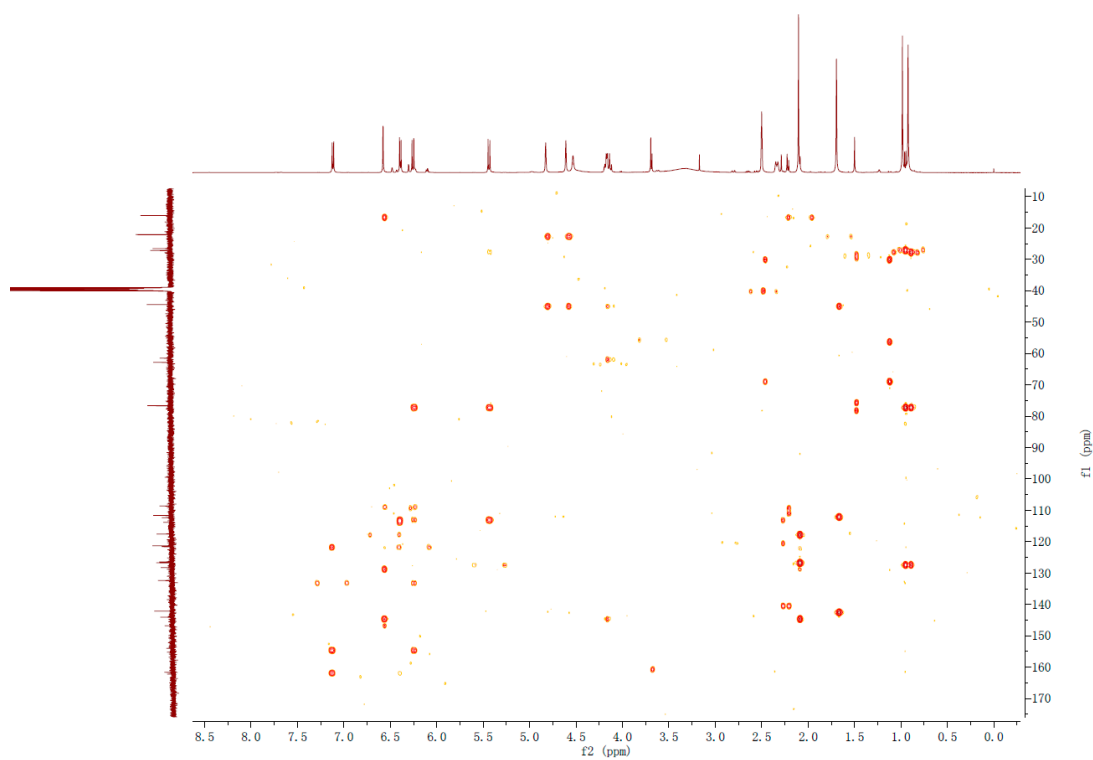

Figure S6. HMBC spectrum of compound **1**.

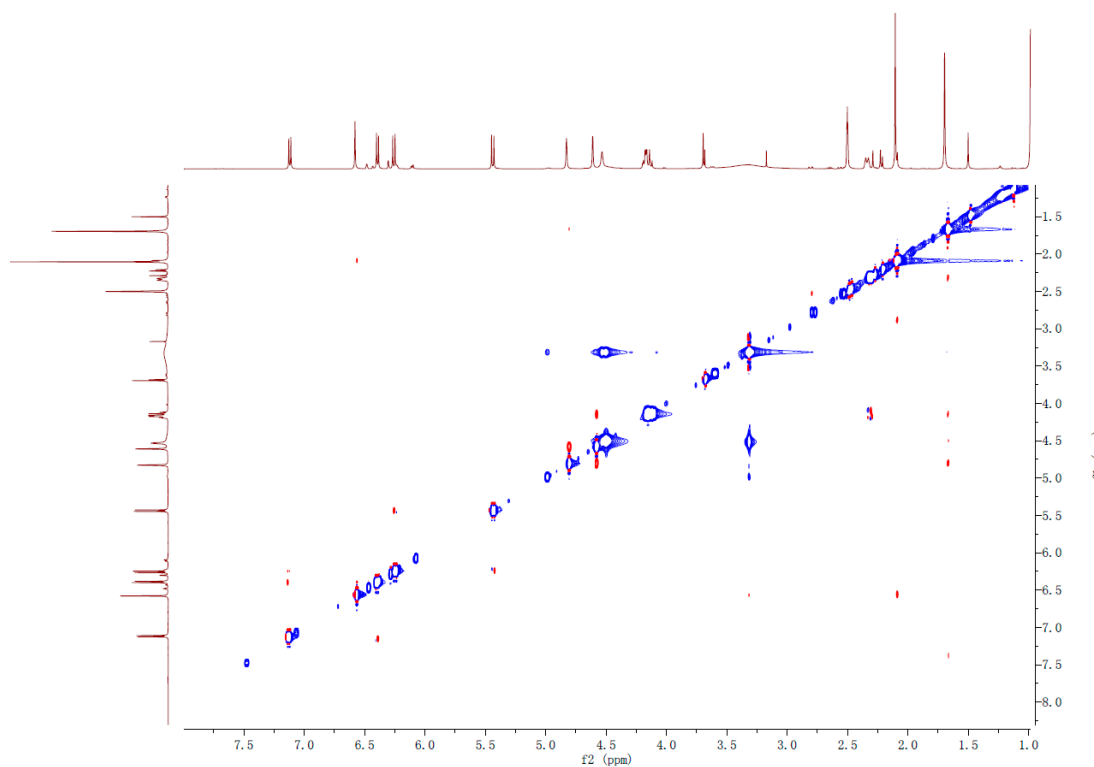

**Figure S7.** NOESY spectrum of compound 1.

20181008-ZX-1\_180930140951 #16 RT: 0.24 AV: 1 NL: 2.69E6  
 T: FTMS - c ESIFull ms [200.00-3000.00]

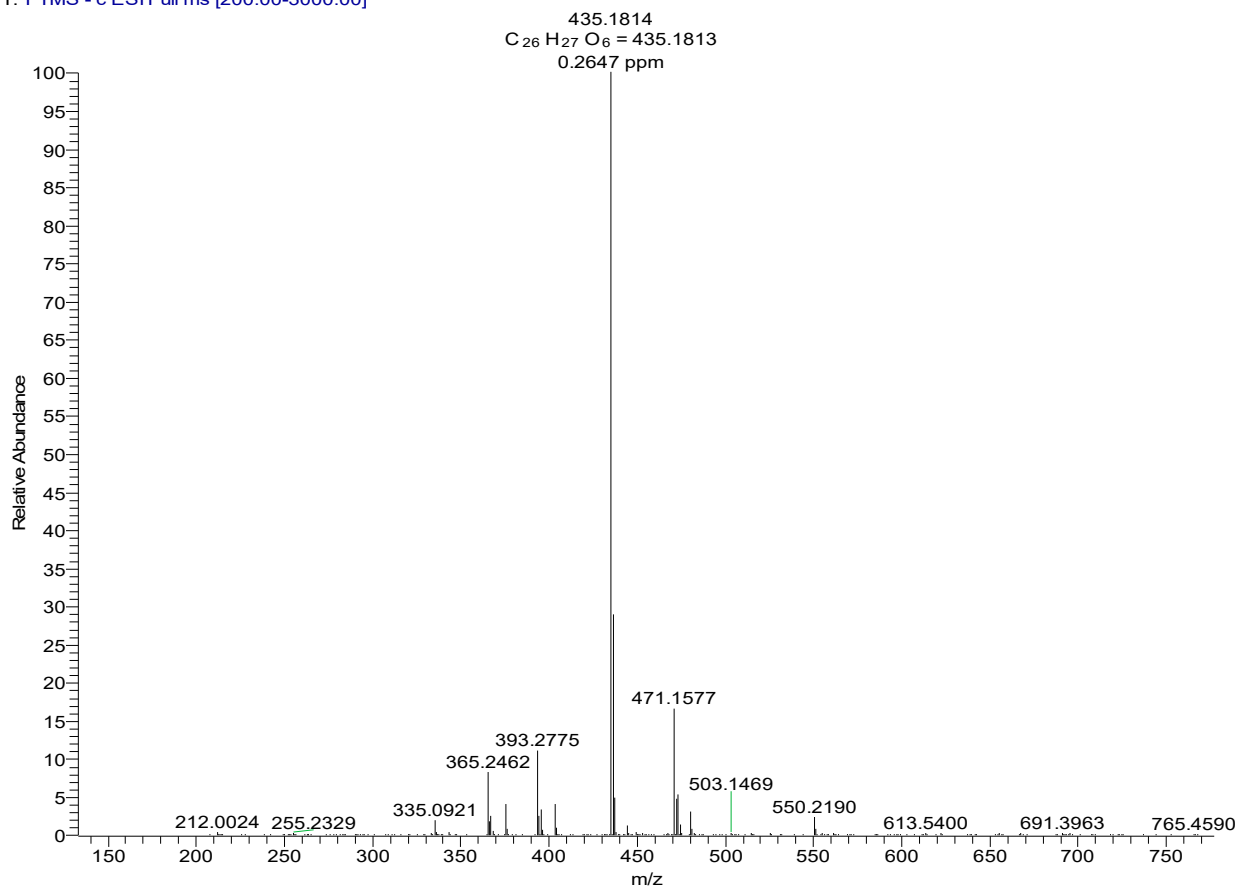

**Figure S8.** HRESIMS spectrum of compound 2.

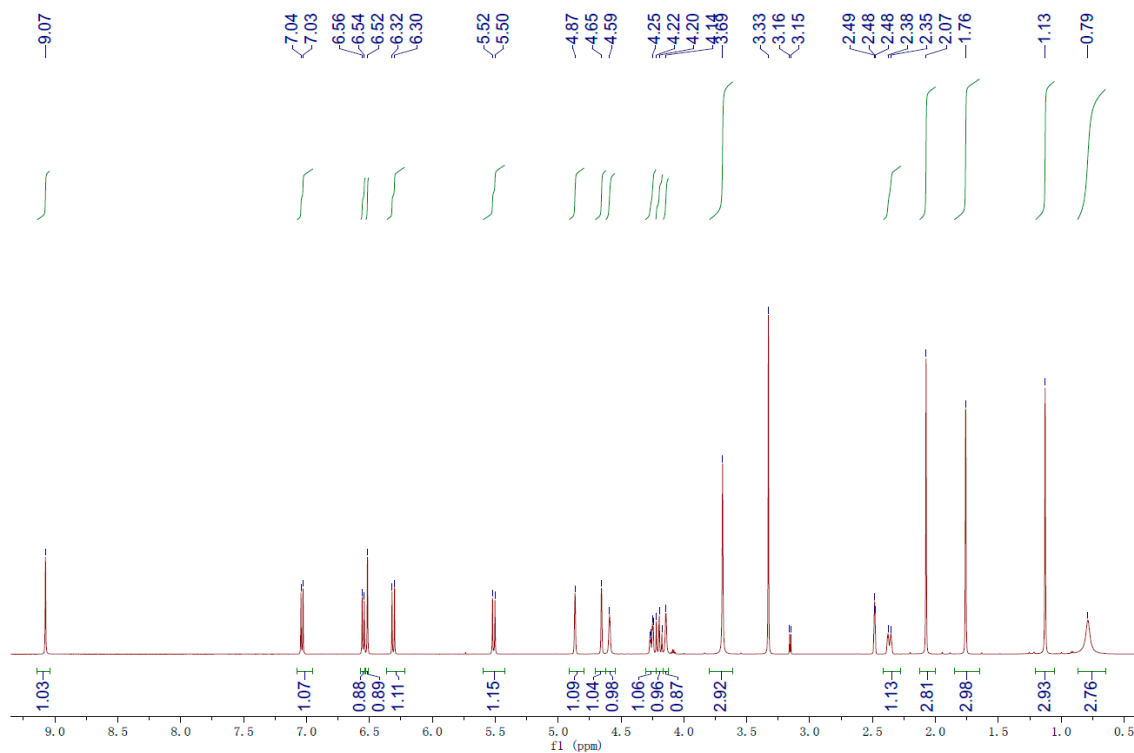

Figure S9.  $^1\text{H}$  NMR (500 MHz,  $\text{DMSO-}d_6$ ) spectrum of compound 2.

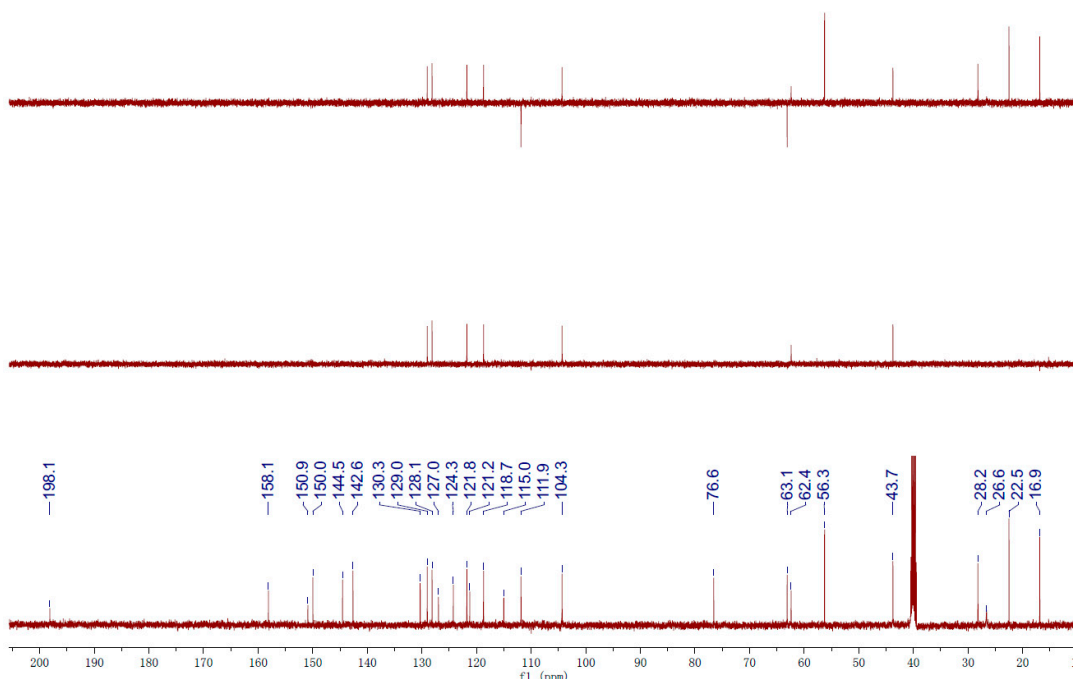

Figure S10.  $^{13}\text{C}$  NMR (125 MHz,  $\text{DMSO-}d_6$ ) and DEPT spectra of compound 2.

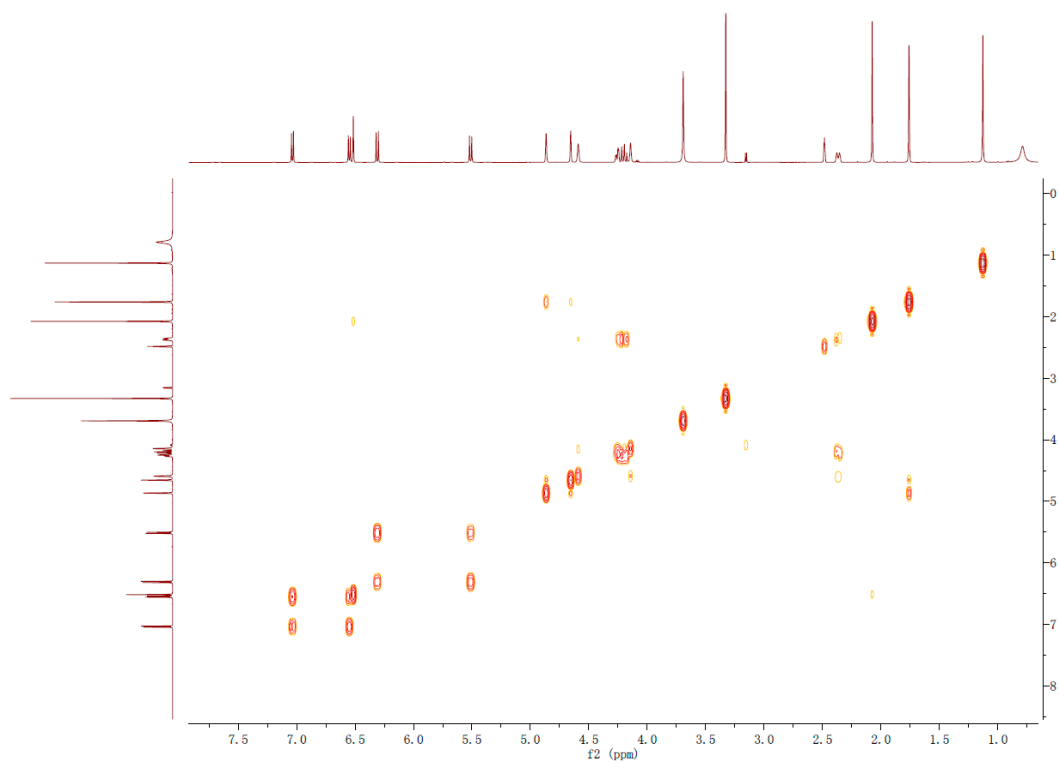

Figure S11. COSY spectrum of compound 2.

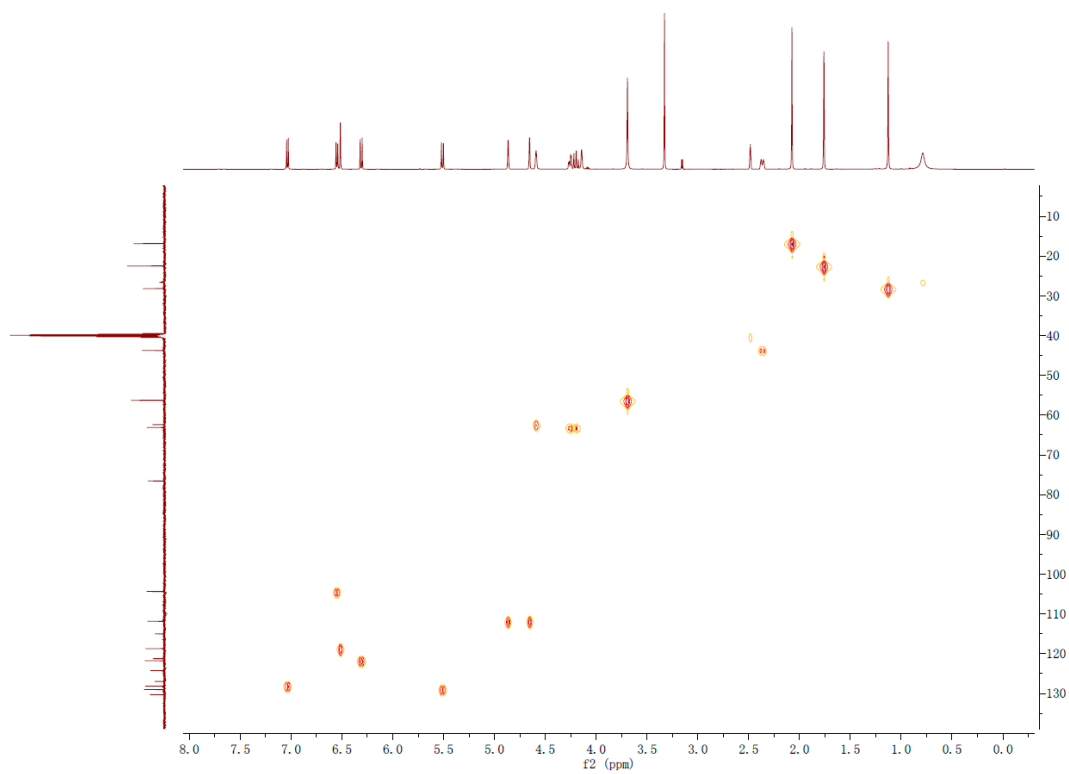

Figure S12. HSQC spectrum of compound 2.

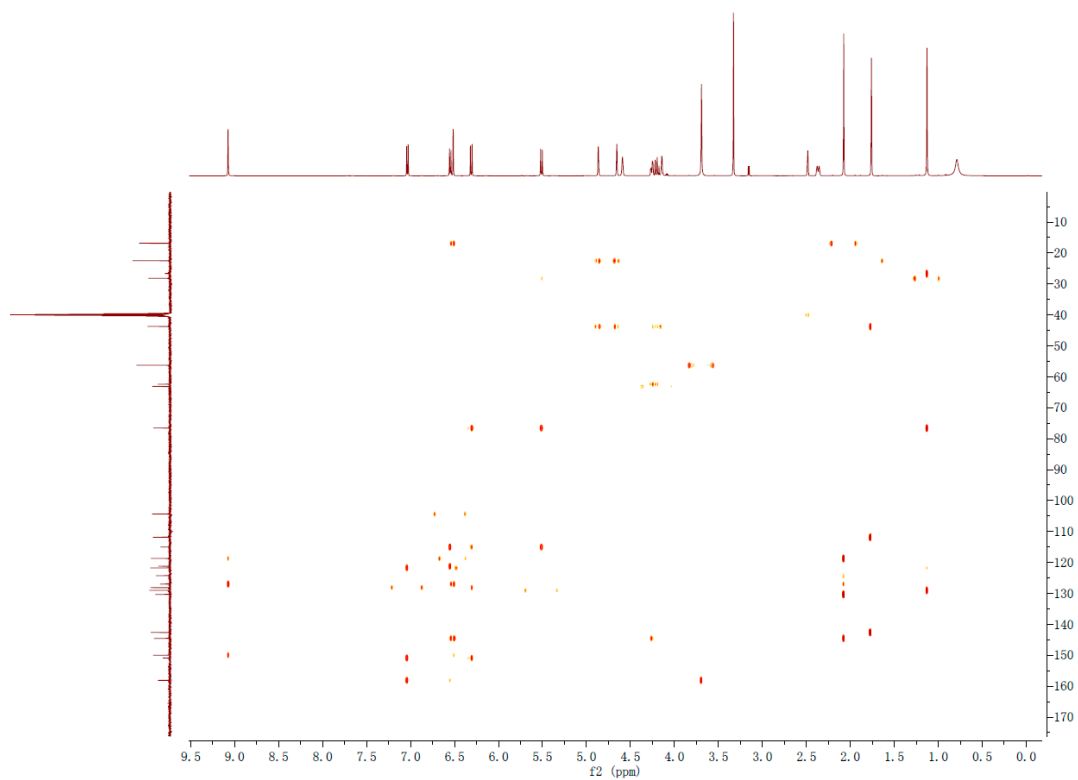

Figure S13. HMBC spectrum of compound 2.

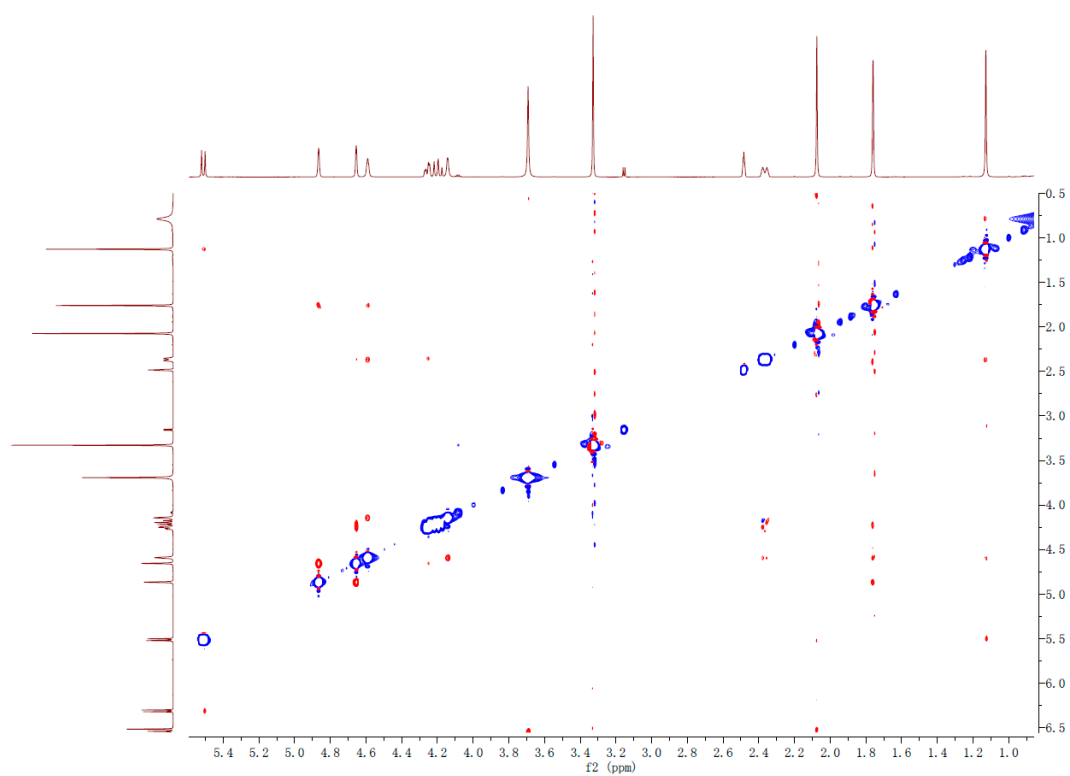

Figure S14. NOESY spectrum of compound 2.



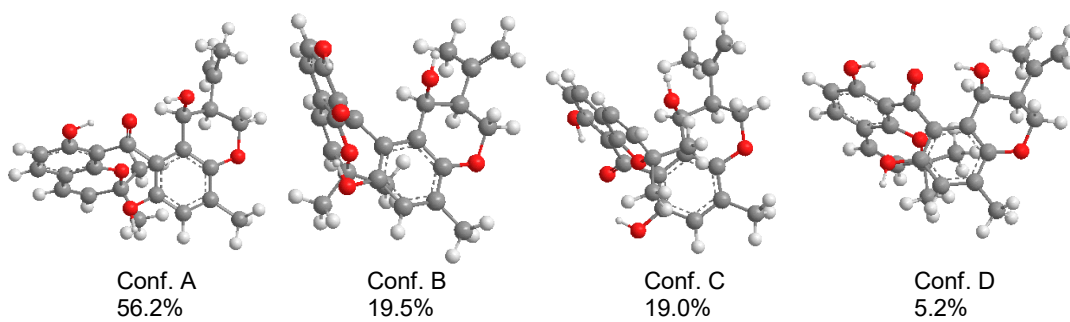

**Figure S15.** Structure and population of the low-energy B3LYP/6-31G(d) conformers (>2%) of (20S,25S)-1.

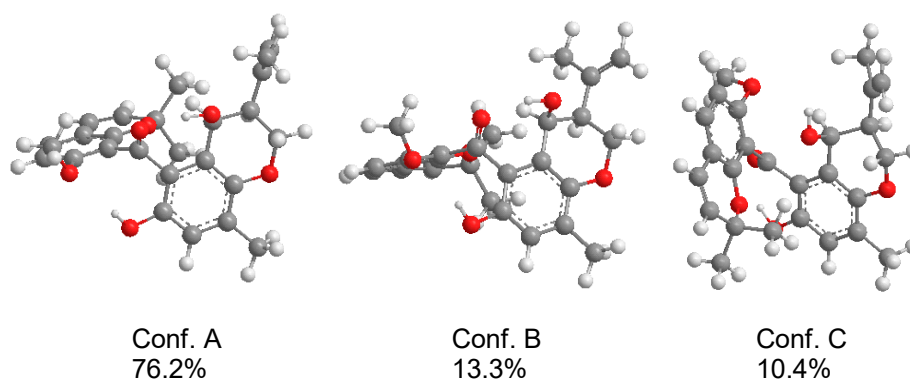

**Figure S16.** Structure and population of the low-energy B3LYP/6-31G(d) conformers (>2%) of (20S,25S)-2.

**Table S1.** Cartesian coordinates of the low-energy conformers ( $\geq 2\%$ ) of **1**.

| (20S,25S)- <b>1</b> , Conf. A |      | Standard Orientation<br>(Ångstroms) |          |          |
|-------------------------------|------|-------------------------------------|----------|----------|
| No.                           | Atom | X                                   | Y        | Z        |
| 1                             | C    | -3.76162                            | -0.57921 | 0.86732  |
| 2                             | C    | -4.5329                             | -1.62064 | 0.33156  |
| 3                             | C    | -4.03741                            | -2.47303 | -0.64583 |
| 4                             | C    | -2.72756                            | -2.30604 | -1.10515 |
| 5                             | C    | -1.91494                            | -1.21445 | -0.64677 |
| 6                             | C    | -2.46466                            | -0.36806 | 0.36272  |
| 7                             | O    | -1.66483                            | 0.57329  | 0.90795  |
| 8                             | C    | -2.21728                            | 1.6945   | 1.69893  |
| 9                             | C    | -3.47041                            | 1.26945  | 2.42395  |
| 10                            | C    | -4.20358                            | 0.23238  | 1.99577  |
| 11                            | C    | -0.57854                            | -1.04168 | -1.22014 |
| 12                            | C    | 0.2056                              | 0.23372  | -1.16002 |
| 13                            | O    | -0.04086                            | -1.99305 | -1.84572 |
| 14                            | C    | 1.50757                             | 0.23973  | -0.60734 |
| 15                            | C    | 2.26267                             | 1.41876  | -0.64969 |
| 16                            | C    | 1.76592                             | 2.58898  | -1.26038 |
| 17                            | C    | 0.49504                             | 2.54405  | -1.83163 |
| 18                            | C    | -0.28638                            | 1.38585  | -1.7832  |
| 19                            | C    | -2.51984                            | 2.85085  | 0.73462  |
| 20                            | C    | -1.09436                            | 2.05998  | 2.67163  |
| 21                            | O    | -2.27894                            | -3.19996 | -2.01042 |
| 22                            | O    | -1.53075                            | 1.32621  | -2.36373 |
| 23                            | C    | 2.59743                             | 3.84575  | -1.295   |
| 24                            | O    | 3.50661                             | 1.53206  | -0.07827 |
| 25                            | C    | 4.16756                             | 0.32016  | 0.32464  |
| 26                            | C    | 3.19632                             | -0.62096 | 1.03956  |
| 27                            | C    | 2.08281                             | -1.00862 | 0.04813  |
| 28                            | O    | 2.62251                             | -1.90358 | -0.93927 |
| 29                            | C    | 3.87695                             | -1.81037 | 1.70753  |
| 30                            | C    | 3.472                               | -2.20528 | 2.92453  |
| 31                            | C    | 5.00578                             | -2.51066 | 0.98624  |
| 32                            | H    | -5.53548                            | -1.78038 | 0.72174  |
| 33                            | H    | -4.62945                            | -3.29376 | -1.03722 |
| 34                            | H    | -3.77396                            | 1.87213  | 3.27624  |
| 35                            | H    | -5.12875                            | -0.04682 | 2.49496  |
| 36                            | H    | 0.10435                             | 3.42987  | -2.32864 |
| 37                            | H    | -3.25883                            | 2.54688  | -0.01343 |
| 38                            | H    | -1.6078                             | 3.17538  | 0.22349  |
| 39                            | H    | -2.92787                            | 3.69961  | 1.29535  |
| 40                            | H    | -0.18423                            | 2.32204  | 2.1224   |
| 41                            | H    | -1.39372                            | 2.9222   | 3.27728  |
| 42                            | H    | -0.87446                            | 1.22368  | 3.34299  |
| 43                            | H    | -1.31424                            | -3.01269 | -2.15267 |
| 44                            | H    | -1.76111                            | 2.19074  | -2.74116 |
| 45                            | H    | 2.82717                             | 4.19826  | -0.28187 |
| 46                            | H    | 3.55892                             | 3.67243  | -1.79304 |
| 47                            | H    | 2.07213                             | 4.64536  | -1.82564 |

|    |   |         |          |          |
|----|---|---------|----------|----------|
| 48 | H | 4.59913 | -0.15492 | -0.5644  |
| 49 | H | 4.97602 | 0.64633  | 0.98278  |
| 50 | H | 2.70294 | -0.03878 | 1.82884  |
| 51 | H | 1.29249 | -1.52834 | 0.6066   |
| 52 | H | 1.88359 | -2.10579 | -1.54601 |
| 53 | H | 3.92511 | -3.0582  | 3.42546  |
| 54 | H | 2.67252 | -1.69436 | 3.45773  |
| 55 | H | 5.36759 | -3.36495 | 1.56764  |
| 56 | H | 5.85612 | -1.83426 | 0.82409  |
| 57 | H | 4.68494 | -2.8622  | 0.00033  |

| (20S,25S)-1,Conf. B |      | Standard Orientation<br>(Ångstroms) |          |          |
|---------------------|------|-------------------------------------|----------|----------|
| No.                 | Atom | X                                   | Y        | Z        |
| 1                   | C    | 3.09089                             | 0.55046  | 0.75576  |
| 2                   | C    | 3.98575                             | 1.10041  | -0.17318 |
| 3                   | C    | 3.8452                              | 0.88516  | -1.53823 |
| 4                   | C    | 2.77579                             | 0.11798  | -2.01042 |
| 5                   | C    | 1.77796                             | -0.38665 | -1.11507 |
| 6                   | C    | 1.99836                             | -0.19966 | 0.27925  |
| 7                   | O    | 1.10296                             | -0.72181 | 1.14922  |
| 8                   | C    | 1.51438                             | -1.02733 | 2.53454  |
| 9                   | C    | 2.44613                             | 0.0465   | 3.04604  |
| 10                  | C    | 3.20406                             | 0.75514  | 2.1963   |
| 11                  | C    | 0.63324                             | -1.12532 | -1.67508 |
| 12                  | C    | -0.68915                            | -1.27989 | -1.01193 |
| 13                  | O    | 0.78176                             | -1.70942 | -2.7831  |
| 14                  | C    | -1.43491                            | -0.20186 | -0.45635 |
| 15                  | C    | -2.66815                            | -0.46768 | 0.14236  |
| 16                  | C    | -3.16613                            | -1.78669 | 0.26937  |
| 17                  | C    | -2.44293                            | -2.81921 | -0.31219 |
| 18                  | C    | -1.24761                            | -2.57541 | -0.99935 |
| 19                  | C    | 2.20527                             | -2.39984 | 2.52588  |
| 20                  | C    | 0.20587                             | -1.07054 | 3.32312  |
| 21                  | O    | 2.71875                             | -0.10103 | -3.34318 |
| 22                  | O    | -0.65605                            | -3.6564  | -1.59446 |
| 23                  | C    | -4.47294                            | -2.0417  | 0.97398  |
| 24                  | O    | -3.47756                            | 0.5097   | 0.67114  |
| 25                  | C    | -3.23015                            | 1.85865  | 0.24461  |
| 26                  | C    | -1.74399                            | 2.17656  | 0.35672  |
| 27                  | C    | -0.96602                            | 1.2346   | -0.59754 |
| 28                  | O    | -1.14585                            | 1.58838  | -1.98184 |
| 29                  | C    | -1.37943                            | 3.63554  | 0.13214  |
| 30                  | C    | -2.05896                            | 4.43832  | -0.70332 |
| 31                  | C    | -0.17619                            | 4.12713  | 0.90179  |
| 32                  | H    | 4.82042                             | 1.69427  | 0.19198  |
| 33                  | H    | 4.56212                             | 1.27894  | -2.25126 |
| 34                  | H    | 2.50769                             | 0.1843   | 4.12251  |
| 35                  | H    | 3.90842                             | 1.50224  | 2.55521  |
| 36                  | H    | -2.81888                            | -3.83805 | -0.2768  |

|    |   |          |          |          |
|----|---|----------|----------|----------|
| 37 | H | 3.101    | -2.38186 | 1.89608  |
| 38 | H | 1.52191  | -3.1705  | 2.15166  |
| 39 | H | 2.51002  | -2.66818 | 3.54366  |
| 40 | H | -0.47395 | -1.81367 | 2.89435  |
| 41 | H | 0.41099  | -1.34734 | 4.36276  |
| 42 | H | -0.28739 | -0.09356 | 3.31512  |
| 43 | H | 2.02573  | -0.78967 | -3.49804 |
| 44 | H | -0.0146  | -3.32419 | -2.25464 |
| 45 | H | -5.29499 | -1.4983  | 0.49275  |
| 46 | H | -4.71336 | -3.10877 | 0.97156  |
| 47 | H | -4.43587 | -1.69753 | 2.01473  |
| 48 | H | -3.59009 | 1.97051  | -0.78542 |
| 49 | H | -3.83256 | 2.4854   | 0.90463  |
| 50 | H | -1.43095 | 1.90516  | 1.375    |
| 51 | H | 0.09567  | 1.3129   | -0.35493 |
| 52 | H | -0.92209 | 2.53238  | -2.07675 |
| 53 | H | -1.76199 | 5.47466  | -0.84815 |
| 54 | H | -2.93299 | 4.10719  | -1.25771 |
| 55 | H | -0.36799 | 4.08863  | 1.98282  |
| 56 | H | 0.08085  | 5.15661  | 0.63382  |
| 57 | H | 0.70268  | 3.4949   | 0.71762  |

| (20S,25S)-1,Conf. C |      | Standard Orientation<br>(Ångstroms) |          |          |
|---------------------|------|-------------------------------------|----------|----------|
| No.                 | Atom | X                                   | Y        | Z        |
| 1                   | C    | 2.98973                             | 1.01866  | -0.92025 |
| 2                   | C    | 3.4935                              | 2.18492  | -0.33028 |
| 3                   | C    | 3.16894                             | 2.5495   | 0.97279  |
| 4                   | C    | 2.29562                             | 1.74802  | 1.71121  |
| 5                   | C    | 1.66537                             | 0.60756  | 1.11849  |
| 6                   | C    | 2.08571                             | 0.22516  | -0.18629 |
| 7                   | O    | 1.59603                             | -0.91891 | -0.70278 |
| 8                   | C    | 2.29804                             | -1.61179 | -1.8008  |
| 9                   | C    | 2.95871                             | -0.61332 | -2.72169 |
| 10                  | C    | 3.31109                             | 0.6031   | -2.28071 |
| 11                  | C    | 0.67915                             | -0.14285 | 1.90154  |
| 12                  | C    | -0.43281                            | -0.93215 | 1.30115  |
| 13                  | O    | 0.76237                             | -0.14377 | 3.15906  |
| 14                  | C    | -1.35917                            | -0.39188 | 0.36859  |
| 15                  | C    | -2.39308                            | -1.20647 | -0.10534 |
| 16                  | C    | -2.50417                            | -2.56454 | 0.27637  |
| 17                  | C    | -1.6031                             | -3.06126 | 1.21071  |
| 18                  | C    | -0.61068                            | -2.24819 | 1.76767  |
| 19                  | C    | 1.2063                              | -2.40763 | -2.51733 |
| 20                  | C    | 3.33962                             | -2.54429 | -1.16224 |
| 21                  | O    | 2.04988                             | 2.11062  | 2.99238  |
| 22                  | O    | 0.18341                             | -2.81555 | 2.73217  |
| 23                  | C    | -3.61427                            | -3.42104 | -0.27537 |
| 24                  | O    | -3.40581                            | -0.75684 | -0.91425 |
| 25                  | C    | -3.37963                            | 0.60756  | -1.37003 |

|    |   |          |          |          |
|----|---|----------|----------|----------|
| 26 | C | -2.81184 | 1.53639  | -0.3014  |
| 27 | C | -1.35496 | 1.0774   | -0.01596 |
| 28 | O | -0.53385 | 1.26192  | -1.17597 |
| 29 | C | -2.87883 | 3.01537  | -0.64641 |
| 30 | C | -2.83219 | 3.48074  | -1.9057  |
| 31 | C | -2.97727 | 3.94602  | 0.53955  |
| 32 | H | 4.1773   | 2.80682  | -0.90362 |
| 33 | H | 3.60029  | 3.42882  | 1.44003  |
| 34 | H | 3.17633  | -0.94187 | -3.73478 |
| 35 | H | 3.82678  | 1.31045  | -2.92649 |
| 36 | H | -1.68578 | -4.08821 | 1.5563   |
| 37 | H | 0.45373  | -1.73737 | -2.94401 |
| 38 | H | 0.71421  | -3.0946  | -1.82122 |
| 39 | H | 1.64938  | -2.99508 | -3.32877 |
| 40 | H | 2.8505   | -3.26444 | -0.49638 |
| 41 | H | 3.87402  | -3.09802 | -1.94257 |
| 42 | H | 4.07355  | -1.96963 | -0.5875  |
| 43 | H | 1.5681   | 1.36314  | 3.42342  |
| 44 | H | 0.60072  | -2.09819 | 3.24715  |
| 45 | H | -3.55183 | -4.43906 | 0.11999  |
| 46 | H | -4.59776 | -3.00916 | -0.01772 |
| 47 | H | -3.572   | -3.47048 | -1.37012 |
| 48 | H | -2.78381 | 0.64898  | -2.28793 |
| 49 | H | -4.41761 | 0.85025  | -1.60625 |
| 50 | H | -3.38321 | 1.38008  | 0.62424  |
| 51 | H | -0.94813 | 1.66978  | 0.81327  |
| 52 | H | -0.6153  | 2.19593  | -1.44309 |
| 53 | H | -2.86498 | 4.54898  | -2.10778 |
| 54 | H | -2.77818 | 2.83016  | -2.77428 |
| 55 | H | -3.91916 | 3.78192  | 1.08064  |
| 56 | H | -2.93422 | 4.99571  | 0.23332  |
| 57 | H | -2.16796 | 3.76548  | 1.25964  |

| No. | Atom | Standard Orientation<br>(Ångstroms) |          |          |
|-----|------|-------------------------------------|----------|----------|
|     |      | X                                   | Y        | Z        |
| 1   | C    | -3.73825                            | -0.55496 | 0.85554  |
| 2   | C    | -4.52831                            | -1.56215 | 0.28283  |
| 3   | C    | -4.05287                            | -2.37866 | -0.73431 |
| 4   | C    | -2.74437                            | -2.21056 | -1.19712 |
| 5   | C    | -1.91279                            | -1.15078 | -0.6998  |
| 6   | C    | -2.44283                            | -0.33977 | 0.34859  |
| 7   | O    | -1.62629                            | 0.56768  | 0.92584  |
| 8   | C    | -2.16013                            | 1.66424  | 1.76296  |
| 9   | C    | -3.4092                             | 1.22278  | 2.48531  |
| 10  | C    | -4.15889                            | 0.21291  | 2.02219  |
| 11  | C    | -0.57754                            | -0.97401 | -1.27459 |
| 12  | C    | 0.2264                              | 0.28567  | -1.16386 |
| 13  | O    | -0.05829                            | -1.90593 | -1.94348 |
| 14  | C    | 1.52815                             | 0.25165  | -0.61137 |

|    |   |          |          |          |
|----|---|----------|----------|----------|
| 15 | C | 2.29653  | 1.42203  | -0.60299 |
| 16 | C | 1.81432  | 2.62444  | -1.16021 |
| 17 | C | 0.54393  | 2.6198   | -1.73397 |
| 18 | C | -0.25044 | 1.46932  | -1.73754 |
| 19 | C | -2.46403 | 2.85802  | 0.84552  |
| 20 | C | -1.0237  | 1.9847   | 2.73564  |
| 21 | O | -2.3154  | -3.0717  | -2.14273 |
| 22 | O | -1.49474 | 1.44873  | -2.32089 |
| 23 | C | 2.661    | 3.87133  | -1.13767 |
| 24 | O | 3.54068  | 1.4913   | -0.02702 |
| 25 | C | 4.1928   | 0.25025  | 0.29423  |
| 26 | C | 3.22776  | -0.71574 | 0.97643  |
| 27 | C | 2.08472  | -1.0307  | -0.00867 |
| 28 | O | 2.60248  | -1.90066 | -1.02864 |
| 29 | C | 3.87598  | -1.9647  | 1.55529  |
| 30 | C | 5.17544  | -2.2583  | 1.40285  |
| 31 | C | 2.96104  | -2.85991 | 2.35939  |
| 32 | H | -5.52971 | -1.72483 | 0.67483  |
| 33 | H | -4.65954 | -3.17378 | -1.15506 |
| 34 | H | -3.6961  | 1.79228  | 3.36571  |
| 35 | H | -5.08168 | -0.0773  | 2.51948  |
| 36 | H | 0.16366  | 3.53146  | -2.19074 |
| 37 | H | -3.20998 | 2.58592  | 0.09211  |
| 38 | H | -1.55442 | 3.19874  | 0.34074  |
| 39 | H | -2.86459 | 3.68635  | 1.44115  |
| 40 | H | -0.11688 | 2.25747  | 2.18617  |
| 41 | H | -1.30865 | 2.82786  | 3.37413  |
| 42 | H | -0.80478 | 1.12342  | 3.37499  |
| 43 | H | -1.34901 | -2.89293 | -2.28408 |
| 44 | H | -1.71503 | 2.331    | -2.66137 |
| 45 | H | 3.6188   | 3.7105   | -1.64692 |
| 46 | H | 2.14413  | 4.70182  | -1.62767 |
| 47 | H | 2.898    | 4.17205  | -0.10968 |
| 48 | H | 4.59845  | -0.18174 | -0.62863 |
| 49 | H | 5.01772  | 0.53287  | 0.95031  |
| 50 | H | 2.7638   | -0.1737  | 1.81559  |
| 51 | H | 1.28048  | -1.54898 | 0.52966  |
| 52 | H | 1.8599   | -2.06439 | -1.64253 |
| 53 | H | 5.60298  | -3.1491  | 1.85782  |
| 54 | H | 5.85959  | -1.64331 | 0.82529  |
| 55 | H | 2.439    | -2.29371 | 3.14264  |
| 56 | H | 3.52097  | -3.67042 | 2.83628  |
| 57 | H | 2.18705  | -3.3142  | 1.72709  |

**Table S2.** Cartesian coordinates of the low-energy conformers ( $\geq 2\%$ ) of **2**.

| (20S,25S)- <b>2</b> , Conf. A |      | Standard Orientation<br>(Ångstroms) |          |          |
|-------------------------------|------|-------------------------------------|----------|----------|
| No.                           | Atom | X                                   | Y        | Z        |
| 1                             | C    | 3.62695                             | 1.48921  | 0.17477  |
| 2                             | C    | 4.71452                             | 0.70375  | -0.21677 |
| 3                             | C    | 4.54105                             | -0.55464 | -0.80104 |
| 4                             | C    | 3.24293                             | -1.02044 | -1.01426 |
| 5                             | C    | 2.12046                             | -0.25519 | -0.64801 |
| 6                             | C    | 2.32391                             | 0.98857  | -0.04375 |
| 7                             | O    | 1.22449                             | 1.7446   | 0.23325  |
| 8                             | C    | 1.30941                             | 2.79229  | 1.26581  |
| 9                             | C    | 2.6679                              | 3.45722  | 1.2322   |
| 10                            | C    | 3.74792                             | 2.82598  | 0.74653  |
| 11                            | C    | 0.72008                             | -0.68741 | -1.03465 |
| 12                            | C    | -0.18986                            | -1.29862 | -0.02922 |
| 13                            | O    | 0.35467                             | -0.45119 | -2.18968 |
| 14                            | C    | -1.56136                            | -0.88894 | 0.03532  |
| 15                            | C    | -2.38482                            | -1.42913 | 1.02601  |
| 16                            | C    | -1.89947                            | -2.36255 | 1.97303  |
| 17                            | C    | -0.57949                            | -2.77636 | 1.86807  |
| 18                            | C    | 0.27356                             | -2.27576 | 0.87644  |
| 19                            | C    | 1.05727                             | 2.1345   | 2.63176  |
| 20                            | C    | 0.19442                             | 3.77554  | 0.90763  |
| 21                            | O    | 2.93345                             | -2.26532 | -1.51297 |
| 22                            | O    | 1.52606                             | -2.82611 | 0.85501  |
| 23                            | C    | -2.8101                             | -2.90351 | 3.04359  |
| 24                            | O    | -3.70196                            | -1.07861 | 1.18971  |
| 25                            | C    | -4.33012                            | -0.3615  | 0.11549  |
| 26                            | C    | -3.42362                            | 0.77099  | -0.36257 |
| 27                            | C    | -2.12561                            | 0.15755  | -0.92354 |
| 28                            | O    | -2.39297                            | -0.42118 | -2.21122 |
| 29                            | C    | -4.11018                            | 1.74449  | -1.31432 |
| 30                            | C    | -3.89496                            | 3.06257  | -1.18378 |
| 31                            | C    | -5.03958                            | 1.19915  | -2.37444 |
| 32                            | C    | 3.99373                             | -3.10713 | -1.99629 |
| 33                            | H    | 5.72192                             | 1.08206  | -0.06135 |
| 34                            | H    | 5.40446                             | -1.14943 | -1.07333 |
| 35                            | H    | 2.73694                             | 4.45382  | 1.66103  |
| 36                            | H    | 4.72838                             | 3.29672  | 0.75858  |
| 37                            | H    | -0.18691                            | -3.52794 | 2.54734  |
| 38                            | H    | 1.81928                             | 1.37742  | 2.84518  |
| 39                            | H    | 0.06995                             | 1.65952  | 2.65072  |
| 40                            | H    | 1.09616                             | 2.89038  | 3.42429  |
| 41                            | H    | 0.36866                             | 4.2168   | -0.07898 |
| 42                            | H    | 0.15519                             | 4.5818   | 1.64789  |
| 43                            | H    | -0.77439                            | 3.26584  | 0.90064  |
| 44                            | H    | 1.95802                             | -2.75308 | -0.02108 |
| 45                            | H    | -3.19133                            | -2.09729 | 3.68223  |
| 46                            | H    | -3.68573                            | -3.39776 | 2.6062   |



|    |   |          |          |          |
|----|---|----------|----------|----------|
| 47 | H | -2.28252 | -3.6245  | 3.67453  |
| 48 | H | -4.55497 | -1.06658 | -0.69426 |
| 49 | H | -5.26704 | 0.01157  | 0.53492  |
| 50 | H | -3.12578 | 1.33748  | 0.52951  |
| 51 | H | -1.39722 | 0.96787  | -1.04274 |
| 52 | H | -1.51087 | -0.65372 | -2.56332 |
| 53 | H | -4.36043 | 3.78364  | -1.85251 |
| 54 | H | -3.24448 | 3.46471  | -0.40961 |
| 55 | H | -4.53074 | 0.45685  | -2.99714 |
| 56 | H | -5.4146  | 2.00439  | -3.01459 |
| 57 | H | -5.90932 | 0.7005   | -1.92479 |
| 58 | H | 4.6797   | -3.37288 | -1.18563 |
| 59 | H | 3.50236  | -4.0027  | -2.37612 |
| 60 | H | 4.53584  | -2.60673 | -2.80441 |

| (20S,25S)-2,Conf. B | Atom | Standard Orientation<br>(Ångstroms) |          |          |
|---------------------|------|-------------------------------------|----------|----------|
|                     |      | X                                   | Y        | Z        |
| No.                 |      |                                     |          |          |
| 1                   | C    | 3.59338                             | 1.48408  | 0.25309  |
| 2                   | C    | 4.68961                             | 0.71986  | -0.15595 |
| 3                   | C    | 4.52972                             | -0.51786 | -0.78644 |
| 4                   | C    | 3.23672                             | -0.98396 | -1.02851 |
| 5                   | C    | 2.10602                             | -0.23809 | -0.64767 |
| 6                   | C    | 2.29574                             | 0.98395  | 0.00327  |
| 7                   | O    | 1.18922                             | 1.72343  | 0.29765  |
| 8                   | C    | 1.25909                             | 2.72455  | 1.37665  |
| 9                   | C    | 2.61158                             | 3.40258  | 1.37805  |
| 10                  | C    | 3.7                                 | 2.79923  | 0.87573  |
| 11                  | C    | 0.71175                             | -0.66645 | -1.05937 |
| 12                  | C    | -0.20165                            | -1.3086  | -0.07705 |
| 13                  | O    | 0.35406                             | -0.39966 | -2.21012 |
| 14                  | C    | -1.57481                            | -0.90546 | -0.00693 |
| 15                  | C    | -2.39691                            | -1.46836 | 0.97118  |
| 16                  | C    | -1.91081                            | -2.41972 | 1.89975  |
| 17                  | C    | -0.58984                            | -2.82846 | 1.78741  |
| 18                  | C    | 0.26278                             | -2.3043  | 0.80762  |
| 19                  | C    | 1.0082                              | 2.00365  | 2.71059  |
| 20                  | C    | 0.13623                             | 3.71248  | 1.05868  |
| 21                  | O    | 2.93994                             | -2.21391 | -1.56975 |
| 22                  | O    | 1.51685                             | -2.85045 | 0.77532  |
| 23                  | C    | -2.8219                             | -2.98396 | 2.95778  |
| 24                  | O    | -3.71394                            | -1.122   | 1.13765  |
| 25                  | C    | -4.34401                            | -0.40654 | 0.06303  |
| 26                  | C    | -3.45696                            | 0.74381  | -0.39735 |
| 27                  | C    | -2.13878                            | 0.1597   | -0.94405 |
| 28                  | O    | -2.39432                            | -0.38323 | -2.24891 |
| 29                  | C    | -4.11828                            | 1.71687  | -1.3626  |
| 30                  | C    | -5.3546                             | 1.54127  | -1.85102 |
| 31                  | C    | -3.30313                            | 2.93819  | -1.71963 |
| 32                  | C    | 4.01094                             | -3.0358  | -2.06362 |

|    |   |          |          |          |
|----|---|----------|----------|----------|
| 33 | H | 5.69309  | 1.09821  | 0.02296  |
| 34 | H | 5.39949  | -1.09767 | -1.07052 |
| 35 | H | 2.66942  | 4.38248  | 1.84529  |
| 36 | H | 4.6765   | 3.27685  | 0.91231  |
| 37 | H | -0.19603 | -3.59339 | 2.45087  |
| 38 | H | 1.77737  | 1.24588  | 2.89361  |
| 39 | H | 0.02597  | 1.51788  | 2.70349  |
| 40 | H | 1.03582  | 2.72379  | 3.5361   |
| 41 | H | 0.31014  | 4.20025  | 0.09414  |
| 42 | H | 0.087    | 4.48374  | 1.83478  |
| 43 | H | -0.82804 | 3.19526  | 1.02437  |
| 44 | H | 1.95158  | -2.75215 | -0.09681 |
| 45 | H | -2.29503 | -3.7192  | 3.57267  |
| 46 | H | -3.20259 | -2.19197 | 3.61436  |
| 47 | H | -3.69787 | -3.46745 | 2.50926  |
| 48 | H | -4.54846 | -1.10827 | -0.75541 |
| 49 | H | -5.28966 | -0.05567 | 0.47936  |
| 50 | H | -3.18506 | 1.31717  | 0.50322  |
| 51 | H | -1.40766 | 0.97064  | -1.03158 |
| 52 | H | -1.50966 | -0.60373 | -2.60231 |
| 53 | H | -5.80073 | 2.27691  | -2.51682 |
| 54 | H | -5.96662 | 0.67312  | -1.62302 |
| 55 | H | -2.96268 | 3.46546  | -0.81841 |
| 56 | H | -3.88556 | 3.63804  | -2.32712 |
| 57 | H | -2.4038  | 2.66763  | -2.2879  |
| 58 | H | 4.56047  | -2.50955 | -2.85008 |
| 59 | H | 4.68814  | -3.32108 | -1.25219 |
| 60 | H | 3.52947  | -3.92265 | -2.47524 |

| (20S,25S)-2,Conf. C |      | Standard Orientation<br>(Ångstroms) |         |         |
|---------------------|------|-------------------------------------|---------|---------|
| Number              | Atom | X                                   | Y       | Z       |
| 1                   | C    | -1.1233                             | 1.1245  | 0.6412  |
| 2                   | C    | -0.3412                             | 1.3214  | -0.5037 |
| 3                   | C    | -0.6344                             | 0.6361  | -1.6837 |
| 4                   | C    | -1.7223                             | -0.2369 | -1.7276 |
| 5                   | C    | -2.4982                             | -0.4565 | -0.5821 |
| 6                   | C    | -2.2047                             | 0.2344  | 0.6029  |
| 7                   | O    | -3.0331                             | 0.0502  | 1.6772  |
| 8                   | C    | -2.5594                             | 0.4335  | 2.983   |
| 9                   | C    | -1.4981                             | 1.5098  | 2.9715  |
| 10                  | C    | -0.8239                             | 1.8485  | 1.8684  |
| 11                  | C    | -3.6436                             | -1.3874 | -0.6369 |
| 12                  | C    | -3.8091                             | -2.4886 | 0.3468  |
| 13                  | O    | -4.5511                             | -1.1883 | -1.4456 |
| 14                  | C    | -2.8055                             | -3.4409 | 0.6289  |
| 15                  | C    | -3.0664                             | -4.4147 | 1.6144  |
| 16                  | C    | -4.2996                             | -4.4595 | 2.2923  |
| 17                  | C    | -5.2965                             | -3.5388 | 1.9595  |
| 18                  | C    | -5.0582                             | -2.5786 | 0.9844  |

|    |   |         |         |         |
|----|---|---------|---------|---------|
| 19 | C | -2.0267 | -0.8262 | 3.6762  |
| 20 | C | -3.7939 | 0.9486  | 3.7328  |
| 21 | O | -1.9391 | -0.9591 | -2.8729 |
| 22 | O | -6.1093 | -1.7502 | 0.6835  |
| 23 | C | -4.5728 | -5.5099 | 3.3327  |
| 24 | O | -2.1836 | -5.4156 | 1.9405  |
| 25 | C | -0.857  | -5.2791 | 1.4246  |
| 26 | C | -0.8658 | -4.8888 | -0.0562 |
| 27 | C | -1.5028 | -3.487  | -0.1267 |
| 28 | O | -0.6313 | -2.5206 | 0.4606  |
| 29 | C | 0.4804  | -4.9641 | -0.7844 |
| 30 | C | 1.674   | -5.0671 | -0.1742 |
| 31 | C | 0.3997  | -4.9432 | -2.2908 |
| 32 | C | -2.6237 | -0.1595 | -3.8401 |
| 33 | H | 0.5054  | 2.0037  | -0.4833 |
| 34 | H | -0.0087 | 0.7762  | -2.5609 |
| 35 | H | -1.2682 | 2.0052  | 3.9108  |
| 36 | H | -0.056  | 2.6128  | 1.8759  |
| 37 | H | -6.2689 | -3.5715 | 2.4444  |
| 38 | H | -1.1713 | -1.2443 | 3.1326  |
| 39 | H | -2.7908 | -1.6118 | 3.698   |
| 40 | H | -1.7115 | -0.6234 | 4.7055  |
| 41 | H | -4.2162 | 1.8285  | 3.2324  |
| 42 | H | -3.5624 | 1.2197  | 4.7687  |
| 43 | H | -4.5871 | 0.1915  | 3.7445  |
| 44 | H | -5.9067 | -1.3189 | -0.1758 |
| 45 | H | -4.6185 | -6.4993 | 2.8668  |
| 46 | H | -3.7893 | -5.5031 | 4.0975  |
| 47 | H | -5.526  | -5.3317 | 3.8417  |
| 48 | H | -0.308  | -4.5658 | 2.0521  |
| 49 | H | -0.3766 | -6.2558 | 1.5536  |
| 50 | H | -1.5422 | -5.5944 | -0.5624 |
| 51 | H | -1.6741 | -3.2221 | -1.1753 |
| 52 | H | 0.1662  | -2.4854 | -0.0963 |
| 53 | H | 2.5976  | -5.1309 | -0.7443 |
| 54 | H | 1.7828  | -5.0884 | 0.9055  |
| 55 | H | -0.2474 | -5.7507 | -2.6481 |
| 56 | H | 1.3813  | -5.0773 | -2.758  |
| 57 | H | -0.0043 | -3.9891 | -2.6426 |
| 58 | H | -3.4919 | 0.3536  | -3.4115 |
| 59 | H | -1.9393 | 0.5681  | -4.2888 |
| 60 | H | -2.9789 | -0.8247 | -4.6327 |
